# Supplementary material for: Global hotspots of traded phylogenetic and functional diversity
Source: PubMed Central journal article supplement (PMC10412452; doi:10.1038/s41586-023-06371-3), 2023-07-26
Supplement: 41586_2023_6371_MOESM1_ESM.pdf [file 41586_2023_6371_MOESM1_ESM.pdf]

**Supplementary information**

---

**Global hotspots of traded phylogenetic and functional diversity**

---

In the format provided by the authors and unedited

## Supplementary materials

### **Global hotspots of traded phylogenetic and functional diversity**

Liam J. Hughes<sup>1</sup>, Mike R. Massam<sup>1</sup>, Oscar Morton<sup>1</sup>, Felicity A. Edwards<sup>1+</sup>, Brett R. Scheffers<sup>2</sup>, David P. Edwards<sup>1\*</sup>

<sup>1</sup>Ecology and Evolutionary Biology, School of Biosciences, The University of Sheffield, Sheffield, UK

<sup>2</sup>Department of Wildlife Ecology and Conservation, Institute of Food and Agricultural Sciences, University of Florida, Gainesville, FL, USA

\*Correspondence: [david.edwards@sheffield.ac.uk](mailto:david.edwards@sheffield.ac.uk)

+Present address: RSPB Centre for Conservation Science, David Attenborough Building, Pembroke Street, Cambridge CB2 3QZ, UK

**Supplementary Table 1. Pearson correlation coefficient between traded PD and overall PD per realm for birds.** Confidence intervals shown are 95% intervals and *n* denotes the number of grid cells per realm used in the analysis.

| <b>Realm</b>   | <b>Est.</b> | <b>Lower CI</b> | <b>Upper CI</b> | <b><i>p</i> value</b> | <b>t statistic</b> | <b><i>n</i></b> |
|----------------|-------------|-----------------|-----------------|-----------------------|--------------------|-----------------|
| Afrotropical   | 0.976       | 0.974           | 0.978           | 0.00000               | 196.407            | 1926            |
| Australian     | 0.99        | 0.989           | 0.992           | 0.00000               | 179.495            | 645             |
| Madagascan     | 0.958       | 0.926           | 0.977           | 0.00000               | 22.441             | 47              |
| Nearctic       | 0.989       | 0.988           | 0.99            | 0.00000               | 250.699            | 1403            |
| Neotropical    | 0.948       | 0.942           | 0.953           | 0.00000               | 112.236            | 1424            |
| Oceania        | 0.868       | 0.796           | 0.915           | 0.00000               | 14.699             | 73              |
| Oriental       | 0.928       | 0.916           | 0.938           | 0.00000               | 63.625             | 658             |
| Palaearctic    | 0.989       | 0.988           | 0.99            | 0.00000               | 362.187            | 2958            |
| Panamanian     | 0.929       | 0.895           | 0.952           | 0.00000               | 24.25              | 96              |
| Saharo-Arabian | 0.991       | 0.989           | 0.992           | 0.00000               | 216.989            | 895             |
| Sino-Japanese  | 0.984       | 0.98            | 0.987           | 0.00000               | 111.301            | 415             |

**Supplementary Table 2. Pearson correlation coefficient between traded PD and overall PD per realm for mammals.** Confidence intervals shown are 95% intervals and *n* denotes the number of grid cells per realm used in the analysis.

| <b>Realm</b>   | <b>Est</b> | <b>Lower CI</b> | <b>Upper CI</b> | <b><i>p</i> value</b> | <b>t statistic</b> | <b><i>n</i></b> |
|----------------|------------|-----------------|-----------------|-----------------------|--------------------|-----------------|
| Afrotropical   | 0.969      | 0.966           | 0.972           | 0.00000               | 171.808            | 1926            |
| Australian     | 0.841      | 0.816           | 0.862           | 0.00000               | 38.628             | 637             |
| Madagascan     | 0.817      | 0.69            | 0.895           | 0.00000               | 9.383              | 47              |
| Nearctic       | 0.76       | 0.737           | 0.781           | 0.00000               | 43.742             | 1403            |
| Neotropical    | 0.95       | 0.945           | 0.955           | 0.00000               | 114.775            | 1422            |
| Oceania        | 0.822      | 0.73            | 0.885           | 0.00000               | 12.154             | 73              |
| Oriental       | 0.802      | 0.773           | 0.828           | 0.00000               | 34.385             | 658             |
| Palaearctic    | 0.837      | 0.826           | 0.847           | 0.00000               | 83.144             | 2962            |
| Panamanian     | 0.935      | 0.902           | 0.957           | 0.00000               | 24.415             | 96              |
| Saharo-Arabian | 0.872      | 0.856           | 0.887           | 0.00000               | 53.301             | 894             |
| Sino-Japanese  | 0.908      | 0.89            | 0.924           | 0.00000               | 44.123             | 415             |

**Supplementary Table 3. Results from post-hoc Tukey test comparing whether biogeographic realms differ in the proportion of the respective metric traded.** Groups indicate which realms significantly differ from each other ( $p < 0.05$ ).

| <b>Biogeographic Realm</b>           | <b>Mean</b> | <b>Standard Error</b> | <b>Group</b>   | <b>Mean</b> | <b>Standard Error</b> | <b>Group</b> |
|--------------------------------------|-------------|-----------------------|----------------|-------------|-----------------------|--------------|
|                                      |             |                       | <i>Birds</i>   |             |                       |              |
|                                      |             |                       | <i>Mammals</i> |             |                       |              |
| <b><i>Phylogenetic Diversity</i></b> |             |                       |                |             |                       |              |
| Afrotropical                         | 0.797       | 0.001                 | e              | 0.577       | 0.005                 | de           |
| Australian                           | 0.802       | 0.002                 | e              | 0.404       | 0.008                 | b            |
| Madagascan                           | 0.691       | 0.007                 | c              | 0.425       | 0.029                 | bc           |
| Nearctic                             | 0.780       | 0.001                 | d              | 0.606       | 0.005                 | f            |
| Neotropical                          | 0.623       | 0.001                 | a              | 0.458       | 0.006                 | c            |
| Oceania                              | 0.647       | 0.005                 | b              | 0.435       | 0.022                 | bc           |
| Oriental                             | 0.829       | 0.002                 | f              | 0.588       | 0.008                 | ef           |
| Palaearctic                          | 0.861       | 0.001                 | h              | 0.652       | 0.004                 | g            |
| Panamanian                           | 0.682       | 0.005                 | c              | 0.219       | 0.015                 | a            |
| Saharo-Arabian                       | 0.849       | 0.001                 | g              | 0.589       | 0.007                 | ef           |
| Sino-Japanese                        | 0.823       | 0.002                 | f              | 0.541       | 0.010                 | d            |
| <b><i>Cumulative EDGE</i></b>        |             |                       |                |             |                       |              |
| Afrotropical                         | 0.712       | 0.001                 | f              | 0.530       | 0.005                 | e            |
| Australian                           | 0.699       | 0.002                 | e              | 0.259       | 0.007                 | b            |
| Madagascan                           | 0.601       | 0.009                 | c              | 0.345       | 0.029                 | bc           |
| Nearctic                             | 0.658       | 0.002                 | d              | 0.506       | 0.006                 | de           |
| Neotropical                          | 0.499       | 0.002                 | a              | 0.344       | 0.006                 | c            |
| Oceania                              | 0.539       | 0.007                 | b              | 0.295       | 0.021                 | bc           |

|                |       |       |   |       |       |    |
|----------------|-------|-------|---|-------|-------|----|
| Oriental       | 0.752 | 0.002 | h | 0.498 | 0.009 | de |
| Palaearctic    | 0.808 | 0.001 | j | 0.582 | 0.004 | f  |
| Panamanian     | 0.550 | 0.006 | b | 0.174 | 0.013 | a  |
| Saharo-Arabian | 0.770 | 0.002 | i | 0.492 | 0.008 | d  |
| Sino-Japanese  | 0.732 | 0.003 | g | 0.476 | 0.011 | d  |

### ***Cumulative ED***

|                |       |       |   |       |       |    |
|----------------|-------|-------|---|-------|-------|----|
| Afrotropical   | 0.741 | 0.001 | f | 0.530 | 0.005 | e  |
| Australian     | 0.705 | 0.003 | d | 0.259 | 0.007 | b  |
| Madagascan     | 0.646 | 0.010 | c | 0.345 | 0.029 | bc |
| Nearctic       | 0.673 | 0.002 | c | 0.506 | 0.006 | de |
| Neotropical    | 0.540 | 0.002 | a | 0.344 | 0.006 | c  |
| Oceania        | 0.553 | 0.008 | a | 0.295 | 0.021 | bc |
| Oriental       | 0.764 | 0.002 | g | 0.498 | 0.009 | de |
| Palaearctic    | 0.790 | 0.001 | h | 0.582 | 0.004 | f  |
| Panamanian     | 0.593 | 0.007 | b | 0.174 | 0.013 | a  |
| Saharo-Arabian | 0.785 | 0.002 | h | 0.492 | 0.008 | d  |
| Sino-Japanese  | 0.727 | 0.003 | e | 0.476 | 0.011 | d  |

### ***Functional Diversity***

|              |       |       |   |       |       |   |
|--------------|-------|-------|---|-------|-------|---|
| Afrotropical | 0.850 | 0.001 | c | 0.741 | 0.004 | f |
| Australian   | 0.909 | 0.002 | e | 0.080 | 0.003 | a |
| Madagascan   | 0.752 | 0.010 | b | 0.262 | 0.026 | b |
| Nearctic     | 0.933 | 0.001 | f | 0.330 | 0.005 | b |
| Neotropical  | 0.867 | 0.001 | d | 0.610 | 0.005 | c |
| Oceania      | 0.658 | 0.008 | a | 0.108 | 0.011 | a |

|                |       |       |    |       |       |    |
|----------------|-------|-------|----|-------|-------|----|
| Oriental       | 0.908 | 0.002 | e  | 0.763 | 0.006 | f  |
| Palearctic     | 0.943 | 0.001 | g  | 0.610 | 0.003 | cd |
| Panamanian     | 0.864 | 0.005 | cd | 0.675 | 0.020 | de |
| Saharo-Arabian | 0.909 | 0.002 | e  | 0.591 | 0.006 | c  |
| Sino-Japanese  | 0.915 | 0.002 | e  | 0.675 | 0.009 | e  |

---

**Supplementary Table 4. Pearson correlation coefficient between the top 25% traded EDGE species richness and overall EDGE richness per realm for birds.** Confidence intervals shown are 95% intervals and *n* denotes the number of grid cells per realm used in the analysis.

| <b>Realm</b>   | <b>Est.</b> | <b>Lower CI</b> | <b>Upper CI</b> | <b><i>p</i> value</b> | <b>t statistic</b> | <b><i>n</i></b> |
|----------------|-------------|-----------------|-----------------|-----------------------|--------------------|-----------------|
| Afrotropical   | 0.974       | 0.972           | 0.976           | 0                     | 190.595            | 1966            |
| Australian     | 0.956       | 0.949           | 0.962           | 0                     | 85.107             | 679             |
| Madagascan     | 0.981       | 0.968           | 0.989           | 0                     | 36.628             | 54              |
| Nearctic       | 0.949       | 0.943           | 0.953           | 0                     | 118.363            | 1569            |
| Neotropical    | 0.955       | 0.951           | 0.96            | 0                     | 123.92             | 1468            |
| Oceanian       | 0.871       | 0.812           | 0.913           | 0                     | 17.117             | 95              |
| Oriental       | 0.959       | 0.953           | 0.964           | 0                     | 91.001             | 730             |
| Palaearctic    | 0.956       | 0.953           | 0.959           | 0                     | 187.059            | 3357            |
| Panamanian     | 0.98        | 0.971           | 0.986           | 0                     | 52.983             | 119             |
| Saharo-Arabian | 0.98        | 0.978           | 0.983           | 0                     | 152.246            | 936             |
| Sino-Japanese  | 0.977       | 0.972           | 0.981           | 0                     | 95.721             | 436             |



**Supplementary Table 5. Pearson correlation coefficient between the top 25% traded EDGE species richness and overall EDGE richness per realm for mammals.** Confidence intervals shown are 95% intervals and *n* denotes the number of grid cells per realm used in the analysis.

| <b>Realm</b>   | <b>Est.</b> | <b>Lower CI</b> | <b>Upper CI</b> | <b><i>p</i> value</b> | <b>t statistic</b> | <b><i>n</i></b> |
|----------------|-------------|-----------------|-----------------|-----------------------|--------------------|-----------------|
| Afrotropical   | 0.918       | 0.91            | 0.925           | 0                     | 95.242             | 1966            |
| Australian     | 0.632       | 0.583           | 0.677           | 0                     | 20.422             | 679             |
| Madagascan     | 0.889       | 0.813           | 0.935           | 0                     | 13.718             | 54              |
| Nearctic       | 0.428       | 0.353           | 0.498           | 0                     | 10.464             | 1569            |
| Neotropical    | 0.807       | 0.787           | 0.826           | 0                     | 47.619             | 1468            |
| Oceanian       | 0.586       | 0.343           | 0.755           | 0                     | 4.569              | 95              |
| Oriental       | 0.886       | 0.868           | 0.902           | 0                     | 48.332             | 730             |
| Palaearctic    | 0.526       | 0.491           | 0.559           | 0                     | 26.05              | 3357            |
| Panamanian     | 0.564       | 0.393           | 0.697           | 0                     | 6.033              | 119             |
| Saharo-Arabian | 0.199       | -0.112          | 0.474           | 0.207583              | 1.281              | 936             |
| Sino-Japanese  | 0.863       | 0.826           | 0.892           | 0                     | 26.031             | 436             |

**Supplementary Table 6. Pearson correlation coefficient between traded FD species richness and overall FD per realm for birds.** Confidence intervals shown are 95% intervals and *n* denotes the number of grid cells per realm used in the analysis.

| <b>Realm</b>   | <b>Est.</b> | <b>Lower CI</b> | <b>Upper CI</b> | <b><i>p</i> value</b> | <b>t statistic</b> | <b><i>n</i></b> |
|----------------|-------------|-----------------|-----------------|-----------------------|--------------------|-----------------|
| Afrotropical   | 0.971       | 0.968           | 0.973           | 0                     | 178.589            | 1966            |
| Australian     | 0.975       | 0.971           | 0.979           | 0                     | 114.946            | 679             |
| Madagascan     | 0.995       | 0.991           | 0.997           | 0                     | 69.535             | 54              |
| Nearctic       | 0.993       | 0.993           | 0.994           | 0                     | 337.733            | 1562            |
| Neotropical    | 0.979       | 0.977           | 0.981           | 0                     | 185.801            | 1467            |
| Oceanian       | 0.978       | 0.967           | 0.985           | 0                     | 45.111             | 95              |
| Oriental       | 0.989       | 0.987           | 0.99            | 0                     | 177.879            | 730             |
| Palaearctic    | 0.996       | 0.996           | 0.997           | 0                     | 659.633            | 3274            |
| Panamanian     | 0.987       | 0.981           | 0.991           | 0                     | 66.516             | 119             |
| Saharo-Arabian | 0.981       | 0.979           | 0.984           | 0                     | 155.86             | 936             |
| Sino-Japanese  | 0.993       | 0.992           | 0.994           | 0                     | 176.849            | 436             |

**Supplementary Table 7. Pearson correlation coefficient between traded FD species richness and overall FD per realm for mammals.** Confidence intervals shown are 95% intervals and *n* denotes the number of grid cells per realm used in the analysis.

| <b>Realm</b>   | <b>Est.</b> | <b>Lower CI</b> | <b>Upper CI</b> | <b><i>p</i> value</b> | <b>t statistic</b> | <b><i>n</i></b> |
|----------------|-------------|-----------------|-----------------|-----------------------|--------------------|-----------------|
| Afrotropical   | 0.975       | 0.972           | 0.977           | 0                     | 190.947            | 1935            |
| Australian     | 0.542       | 0.474           | 0.604           | 0                     | 13.829             | 461             |
| Madagascan     | 0.579       | 0.33            | 0.752           | 0                     | 4.432              | 41              |
| Nearctic       | 0.441       | 0.398           | 0.481           | 0                     | 18.797             | 1469            |
| Neotropical    | 0.98        | 0.978           | 0.982           | 0                     | 184.925            | 1403            |
| Oceanian       | 0.537       | 0.351           | 0.682           | 0                     | 5.398              | 74              |
| Oriental       | 0.82        | 0.794           | 0.843           | 0                     | 37.228             | 676             |
| Palaearctic    | 0.822       | 0.81            | 0.833           | 0                     | 79.653             | 3049            |
| Panamanian     | 0.804       | 0.711           | 0.87            | 0                     | 12.029             | 81              |
| Saharo-Arabian | 0.88        | 0.864           | 0.894           | 0                     | 55.398             | 897             |
| Sino-Japanese  | 0.9         | 0.88            | 0.917           | 0                     | 42.033             | 418             |

**Supplementary Table 8 - Model coefficients of the fixed effects included in the phylogenetic Bayesian models.** Intervals represent the upper and lower bounds of the 90% highest density intervals. Values highlighted in bold are those where the HDCl does not cross 0 and the MPE is greater than 97.5%.

| <b>Birds</b>                        |                 |              |              |                |
|-------------------------------------|-----------------|--------------|--------------|----------------|
|                                     | <b>Estimate</b> | <b>Lower</b> | <b>Upper</b> | <b>MPE (%)</b> |
| <b>Intercept</b>                    | -1.16           | -2.58        | 0.30         |                |
| <b>Body Size</b>                    |                 |              |              |                |
| Body mass (log transformed)         | 0.74            | <b>0.59</b>  | <b>0.89</b>  | 100.00         |
| <b>Diet</b>                         |                 |              |              |                |
| Invertebrates                       | -0.37           | <b>-0.54</b> | <b>-0.21</b> | <b>100.00</b>  |
| Vertebrates                         | 0.32            | <b>0.05</b>  | <b>0.60</b>  | <b>97.06</b>   |
| Fruit & nectar                      | 0.25            | <b>0.07</b>  | <b>0.42</b>  | <b>98.92</b>   |
| Plants & seeds                      | 0.18            | <b>-0.01</b> | <b>0.36</b>  | <b>93.70</b>   |
| <b>Foraging strata</b>              |                 |              |              |                |
| Below water's surface               | 0.23            | -0.25        | 0.70         | 78.24          |
| On water's surface                  | 0.43            | 0.06         | 0.79         | 97.05          |
| Ground                              | 0.21            | 0.04         | 0.39         | 97.49          |
| Understory                          | 0.01            | -0.11        | 0.14         | 56.96          |
| Mid-level canopy (>2m above ground) | -0.05           | -0.20        | 0.10         | 72.10          |
| Canopy                              | 0.25            | <b>0.09</b>  | <b>0.41</b>  | <b>99.29</b>   |
| Aerial                              | -0.01           | <b>-0.49</b> | <b>0.44</b>  | <b>52.31</b>   |
| <b>Activity period</b>              |                 |              |              |                |
| Nocturnal                           | 1.36            | <b>0.31</b>  | <b>2.48</b>  | <b>97.75</b>   |
| <b>Mammals</b>                      |                 |              |              |                |

---

|                             |       |              |              |                |
|-----------------------------|-------|--------------|--------------|----------------|
| <b>Intercept</b>            | -0.21 | -1.88        | 1.48         |                |
| <b>Body Size</b>            |       |              |              |                |
| Body mass (log transformed) | 1.83  | <b>1.61</b>  | <b>2.06</b>  | <b>100.00%</b> |
| <b>Diet</b>                 |       |              |              |                |
| Invertebrates               | 0.05  | -0.32        | 0.43         | 59.63%         |
| Vertebrates                 | 0.04  | -0.44        | 0.51         | 55.14%         |
| Fruit & nectar              | -0.24 | -0.52        | 0.06         | 90.89%         |
| Plants & seeds              | -0.43 | -0.83        | -0.02        | 95.88%         |
| <b>Foraging strata</b>      |       |              |              |                |
| Ground                      | 0.19  | -0.55        | 0.94         | 66.48%         |
| Scansorial                  | 0.33  | -0.45        | 1.12         | 75.80%         |
| Arboreal                    | 0.69  | -0.06        | 1.43         | 93.59%         |
| <b>Activity period</b>      |       |              |              |                |
| Nocturnal                   | -0.08 | -0.55        | 0.39         | 61.65%         |
| Crepuscular                 | 0.14  | -0.20        | 0.47         | 75.48%         |
| Diurnal                     | -0.59 | <b>-1.00</b> | <b>-0.17</b> | <b>99.09%</b>  |

---

**Supplementary Table 9 - Number of species in each analyses.** The maximum number of species were selected based upon the availability of phylogenetic and functional trait data.

| <b>Birds</b>                                                |                |             |
|-------------------------------------------------------------|----------------|-------------|
|                                                             | Traded species | All species |
| Phylogenetic Diversity                                      | 3995           | 9835        |
| Top 25% of evolutionary distinct species                    | 999            | 2458        |
| Top 25% of EDGE species                                     | 997            | 2432        |
| Functional Diversity                                        | 4257           | 10252       |
| Cumulative ED                                               | 3995           | 9835        |
| Cumulative EDGE                                             | 3989           | 9749        |
| PD of species traded as products                            | 2168           | -           |
| PD of species traded as pets                                | 3440           | -           |
| Top 25% of evolutionary distinct species traded as products | 622            | -           |
| Top 25% of evolutionary distinct species traded as pets     | 818            | -           |
| Top 25% of EDGE species traded as products                  | 716            | -           |
| Top 25% of EDGE species traded as pets                      | 736            | -           |
| FD of species traded as products                            | 2280           | -           |
| FD of species traded as products                            | 3678           | -           |
| <b>Mammals</b>                                              |                |             |
| Phylogenetic Diversity                                      | 1167           | 5325        |
| Top 25% of evolutionary distinct species                    | 292            | 1331        |
| Top 25% of EDGE species                                     | 283            | 1163        |
| Functional Diversity                                        | 1175           | 5338        |
| Cumulative ED                                               | 1167           | 5325        |

|                                                             |      |      |
|-------------------------------------------------------------|------|------|
| Cumulative EDGE                                             | 1130 | 4652 |
| PD of species traded as products                            | 1055 | -    |
| PD of species traded as pets                                | 1101 | -    |
| Top 25% of evolutionary distinct species traded as products | 271  | -    |
| Top 25% of evolutionary distinct species traded as pets     | 111  | -    |
| Top 25% of EDGE species traded as products                  | 263  | -    |
| Top 25% of EDGE species traded as pets                      | 149  | -    |
| FD of species traded as products                            | 1109 | -    |
| FD of species traded as pets                                | 501  | -    |

**Supplementary Table 10 - Functional traits used in functional diversity analyses and their phylogenetic signal (for mammals).** Traits denoted with a \* were transformed to binary variables (if proportion was over 25% variable was set to 1) for the phylogenetic multilevel Bayesian models to aid model fit. Traits denoted with a † were standardized for phylogenetic multilevel Bayesian models. For diet and body size, phylogenetic signal shows the Pagels lambda value for the given trait, where 1 indicates it is perfectly phylogenetically conserved under an Brownian motion evolutionary model. For activity period and foraging stratum, phylogenetic signal shows the traits D-statistic whereby 0 represents a trait being perfectly conserved under a Brownian model of evolution. P-values represent the likelihood of whether the observed values would have occurred if traits had evolved randomly; P-values denoted + represent phylogenetic structure evolved under brownian motion.

| Functional Trait Type | Functional Trait                         | Variable Type | Phylogenetic Signal | P-value   |
|-----------------------|------------------------------------------|---------------|---------------------|-----------|
| <i>Mammals</i>        |                                          |               |                     |           |
| Diet                  | Insects                                  | Proportion*   | 0.997               | 0         |
|                       | Vertebrates                              | Proportion*   | 0.995               | 0         |
|                       | Fruit & Nectar                           | Proportion*   | 0.993               | 0         |
|                       | Plants & Seeds                           | Proportion*   | 0.993               | 0         |
| Foraging Strata       | Ground                                   | Categorical   | -0.152              | 0; 0.989+ |
|                       | Scansorial                               | Categorical   | 0.100               | 0; 0.179+ |
|                       | Arboreal                                 | Categorical   | -0.144              | 0; 0.979+ |
|                       | Aerial                                   | Categorical   | -0.286              | 0; 1+     |
| Activity Period       | Diurnal                                  | Binary        | -0.039              | 0; 0.762+ |
|                       | Crepuscular                              | Binary        | 0.020               | 0; 0.387+ |
|                       | Nocturnal                                | Binary        | -0.095              | 0; 0.911+ |
| Species size          | Body mass (in grams) (log transformed) † | Continuous    | 0.999               | 0         |



**Supplementary Table 11 - Mean absolute error from leave-one-out cross validation of the imputed traits using the ML Ancestral State Reconstruction.** The prediction coefficient ( $p^2$ ) interpretation is as follows, 1 indicates a perfect match between prediction and observation and values approaching 0 (or negative) indicate a prediction no better than chance.

| <b>Functional Trait Type</b> | <b>Functional Trait</b> | <b>Mean Absolute Error</b> | <b><math>p^2</math></b> |
|------------------------------|-------------------------|----------------------------|-------------------------|
| <b>Diet</b>                  | Invertebrate            | 1.003                      | 0.939                   |
|                              | Vertebrate              | -0.225                     | 0.880                   |
|                              | Fruit & Nectar          | -0.171                     | 0.904                   |
|                              | Plants & Seeds          | -0.628                     | 0.945                   |
| <b>Foraging Stratum</b>      | Ground                  | -0.011                     | 0.905                   |
|                              | Scansorial              | -0.002                     | 0.611                   |
|                              | Aerial                  | 0.007                      | 0.962                   |
| <b>Activity Period</b>       | Nocturnal               | 0.007                      | 0.841                   |
|                              | Crepuscular             | -0.001                     | 0.750                   |
|                              | Diurnal                 | -0.006                     | 0.813                   |
| <b>Body Size</b>             | Body Mass (grams)       | 174.497                    | 0.727                   |

## BIRDS

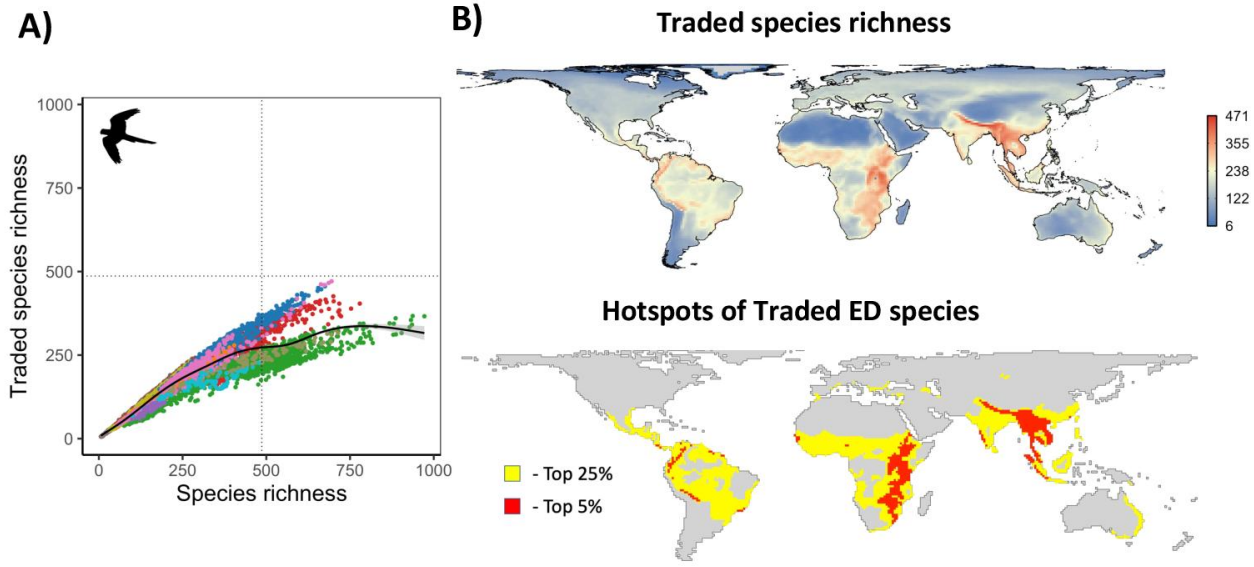

## MAMMALS

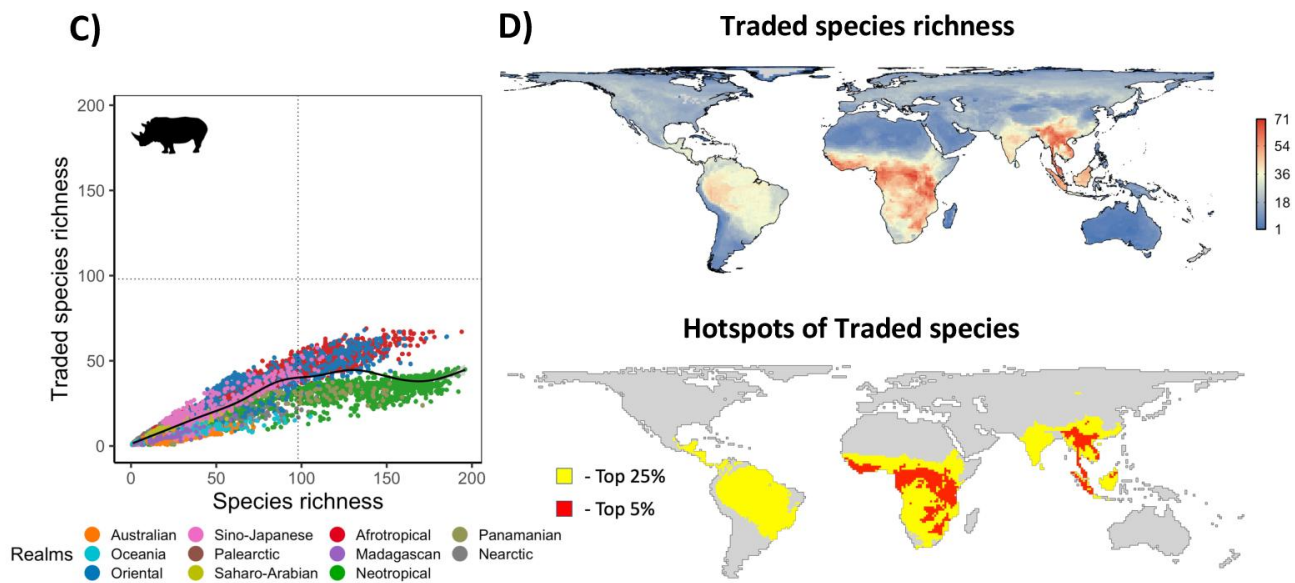

**Figure S1- Richness of species in trade for (A) birds (n= 4265) and (C) mammals (n=1189). (B), and (D) show the maps and hotspots of species richness. Cells highlighted as yellow representing the top 25% of grid cells, and those in red representing the top 5%. (A) and (C) show the relationship between the species richness of the top 25% of traded species and the top 25% of overall species for each measure. Cells are colour coded by biogeographic realm. The black lines in scatterplots indicate a locally estimated scatterplot smoothing (LOESS) fit.**



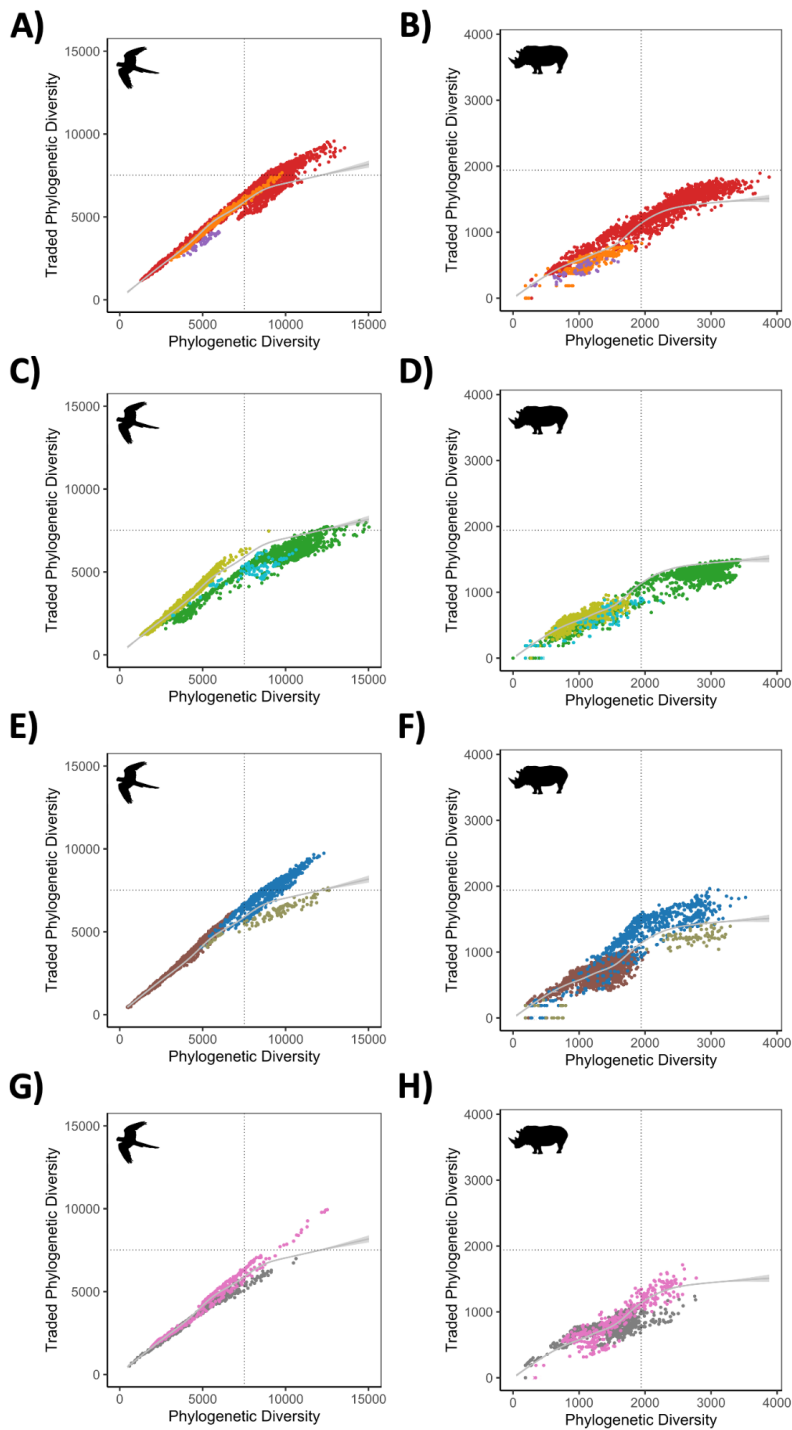

**Figure S2. The relationship between traded PD and overall PD levels in each biogeographic realm.** (A and B) Afrotropical, Australian and Madagascan realms. (C and D) Neotropical, Saharo-Arabian and Oceanian realms. (E and F) Oriental, Panamanian and Palearctic realms. (G and H) Nearctic and Sino-Japanese realms. The grey lines in scatterplots indicate a locally estimated scatterplot smoothing (LOESS) fit of the global trend.

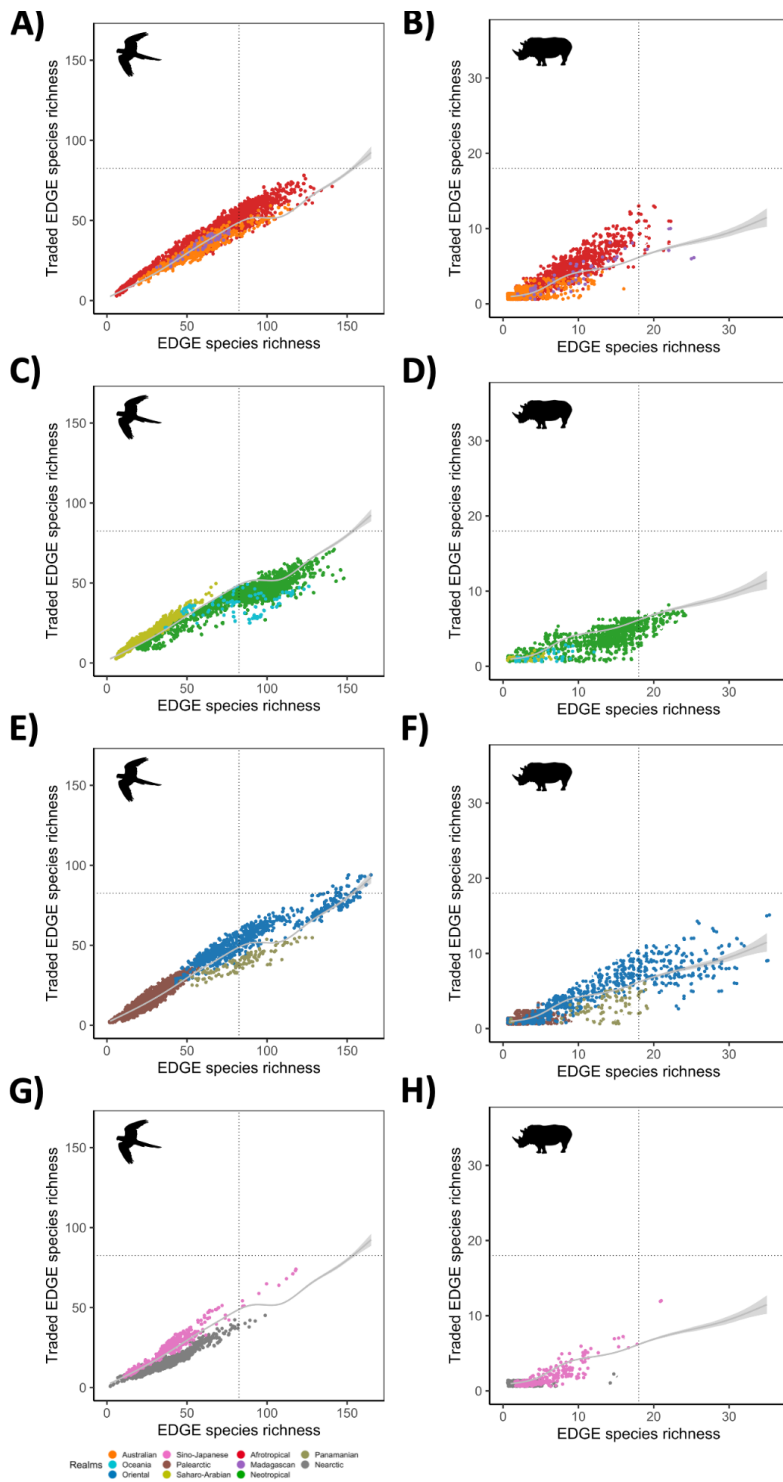

**Figure S3. The relationship between the top 25% of traded EDGE species richness and the top 25% of overall species richness levels in each biogeographic realm. (A and B) Afrotropical, Australian and Madagascan realms. (C and D) Neotropical, Saharo-Arabian and Oceanian realms. (E and F) Oriental, Panamanian and Palearctic realms. (G and H) Nearctic and Sino-Japanese realms. The grey lines in scatterplots indicate a locally estimated scatterplot smoothing (LOESS) fit of the global trend.**

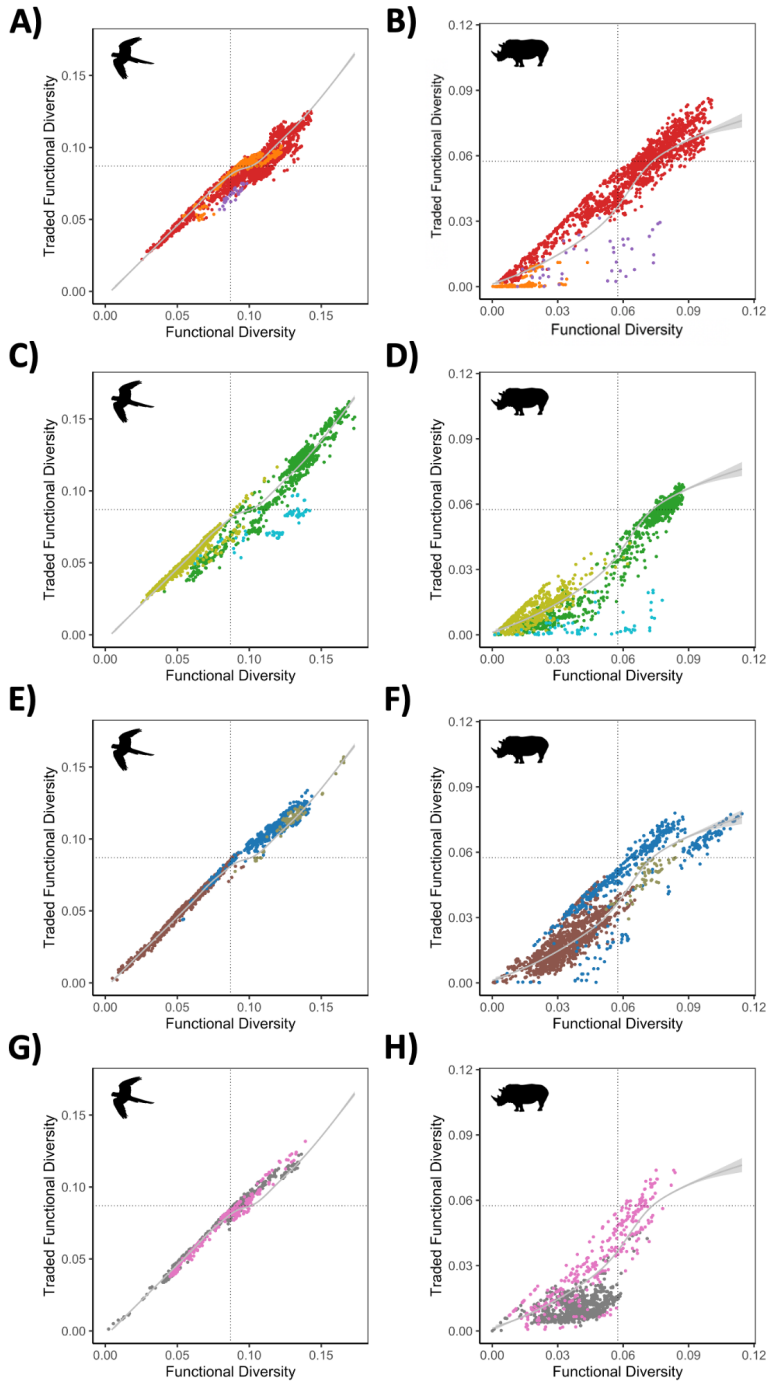

**Figure S4. The relationship between traded FD and overall FD levels in each biogeographic realm.** (A and B) Afrotropical, Australian and Madagascan realms. (C and D) Neotropical, Saharo-Arabian and Oceanian realms. (E and F) Oriental, Panamanian and Palearctic realms. (G and H) Nearctic and Sino-Japanese realms. The grey lines in scatterplots indicate a locally estimated scatterplot smoothing (LOESS) fit of the global trend.
