# Supplementary material for: Global hotspots of traded phylogenetic and functional diversity
Source: PubMed Central journal article supplement (PMC10412452; doi:10.1038/s41586-023-06371-3), 2023-07-26
Supplement: 41586_2023_6371_MOESM2_ESM.pdf [file 41586_2023_6371_MOESM2_ESM.pdf]

## Reporting Summary

Nature Portfolio wishes to improve the reproducibility of the work that we publish. This form provides structure for consistency and transparency in reporting. For further information on Nature Portfolio policies, see our [Editorial Policies](#) and the [Editorial Policy Checklist](#).

### Statistics

For all statistical analyses, confirm that the following items are present in the figure legend, table legend, main text, or Methods section.

n/a Confirmed

- The exact sample size ( $n$ ) for each experimental group/condition, given as a discrete number and unit of measurement
- A statement on whether measurements were taken from distinct samples or whether the same sample was measured repeatedly
- The statistical test(s) used AND whether they are one- or two-sided  
*Only common tests should be described solely by name; describe more complex techniques in the Methods section.*
- A description of all covariates tested
- A description of any assumptions or corrections, such as tests of normality and adjustment for multiple comparisons
- A full description of the statistical parameters including central tendency (e.g. means) or other basic estimates (e.g. regression coefficient) AND variation (e.g. standard deviation) or associated estimates of uncertainty (e.g. confidence intervals)
- For null hypothesis testing, the test statistic (e.g.  $F$ ,  $t$ ,  $r$ ) with confidence intervals, effect sizes, degrees of freedom and  $P$  value noted  
*Give  $P$  values as exact values whenever suitable.*
- For Bayesian analysis, information on the choice of priors and Markov chain Monte Carlo settings
- For hierarchical and complex designs, identification of the appropriate level for tests and full reporting of outcomes
- Estimates of effect sizes (e.g. Cohen's  $d$ , Pearson's  $r$ ), indicating how they were calculated

*Our web collection on [statistics for biologists](#) contains articles on many of the points above.*

### Software and code

Policy information about [availability of computer code](#)

**Data collection** All data used is sourced from existing published studies: Trade data from Scheffers et al. 2019 Science, traits data from EltonTraits 1.0 see here <https://opentraits.org/datasets/elton-traits.html> and all phylogeny data from <https://vertlife.org/data>.

**Data analysis** All analyses were undertaken in R version 4.2.1. Key software packages used included "tidyverse" 1.3.2, "ape" 5.4-1, "mFD" 1.0.1, "brms" 2.18.0, "tidybayes" 3.0.2, "betareg" 3.1-4, "rphylopars" 0.3.2 and "bayestestR" 0.11.5.

For manuscripts utilizing custom algorithms or software that are central to the research but not yet described in published literature, software must be made available to editors and reviewers. We strongly encourage code deposition in a community repository (e.g. GitHub). See the Nature Portfolio [guidelines for submitting code & software](#) for further information.

### Data

Policy information about [availability of data](#)

All manuscripts must include a [data availability statement](#). This statement should provide the following information, where applicable:

- Accession codes, unique identifiers, or web links for publicly available datasets
- A description of any restrictions on data availability
- For clinical datasets or third party data, please ensure that the statement adheres to our [policy](#)

All data used is available upon publication in a publicly accessible repository.

## Human research participants

Policy information about [studies involving human research participants and Sex and Gender in Research](#).

|                             |    |
|-----------------------------|----|
| Reporting on sex and gender | NA |
| Population characteristics  | NA |
| Recruitment                 | NA |
| Ethics oversight            | NA |

Note that full information on the approval of the study protocol must also be provided in the manuscript.

## Field-specific reporting

Please select the one below that is the best fit for your research. If you are not sure, read the appropriate sections before making your selection.

Life sciences       Behavioural & social sciences       Ecological, evolutionary & environmental sciences

For a reference copy of the document with all sections, see [nature.com/documents/nr-reporting-summary-flat.pdf](https://www.nature.com/documents/nr-reporting-summary-flat.pdf)

## Ecological, evolutionary & environmental sciences study design

All studies must disclose on these points even when the disclosure is negative.

|                          |                                                                                                                                                                                                                                                                                                                                                                                                                                                                                                                                                                            |
|--------------------------|----------------------------------------------------------------------------------------------------------------------------------------------------------------------------------------------------------------------------------------------------------------------------------------------------------------------------------------------------------------------------------------------------------------------------------------------------------------------------------------------------------------------------------------------------------------------------|
| Study description        | An analysis of the functional and phylogenetic diversity of species in trade. Raw and standardized metrics are calculated and visualized globally. We further assess the distribution of this using geographic covariates (realm) see Methods for more details. We also examine correlates of species presence in trade using the same functional traits used to calculate functional diversity.                                                                                                                                                                           |
| Research sample          | All data used is sourced from existing published studies: Trade data from Scheffers et al. 2019 Science, traits data from EltonTraits 1.0 see here <a href="https://opentraits.org/datasets/elton-traits.html">https://opentraits.org/datasets/elton-traits.html</a> and all phylogeny data from <a href="https://vertlife.org/data">https://vertlife.org/data</a> . All amphibian, bird, mammal and reptiles species were included except in instances where functional data was absent and no resolved phylogeny of that species was available to impute species traits. |
| Sampling strategy        | NA                                                                                                                                                                                                                                                                                                                                                                                                                                                                                                                                                                         |
| Data collection          | LH collated the data from existing published data sources.                                                                                                                                                                                                                                                                                                                                                                                                                                                                                                                 |
| Timing and spatial scale | NA                                                                                                                                                                                                                                                                                                                                                                                                                                                                                                                                                                         |
| Data exclusions          | No data was excluded except in some sensitivity analyses where we excluded species with occupancy across multiple realms. Similarly some species could not be included as we lacked functional or phylogeny data. See methods for full details.                                                                                                                                                                                                                                                                                                                            |
| Reproducibility          | NA - no experiments were undertaken. However, we report a number of supplementary analyses that were designed to check the robustness of our results. These include presenting raw PD, ED and FD metrics while also calculating the standardized effect size after incorporating species richness and running additional analyses on subsets of the species pool to exclude species with occupancy across multiple realms. See methods for more detail.                                                                                                                    |
| Randomization            | NA                                                                                                                                                                                                                                                                                                                                                                                                                                                                                                                                                                         |
| Blinding                 | NA                                                                                                                                                                                                                                                                                                                                                                                                                                                                                                                                                                         |

Did the study involve field work?  Yes       No

## Reporting for specific materials, systems and methods

We require information from authors about some types of materials, experimental systems and methods used in many studies. Here, indicate whether each material, system or method listed is relevant to your study. If you are not sure if a list item applies to your research, read the appropriate section before selecting a response.

## Materials & experimental systems

- | n/a                                 | Included in the study                                  |
|-------------------------------------|--------------------------------------------------------|
| <input checked="" type="checkbox"/> | <input type="checkbox"/> Antibodies                    |
| <input checked="" type="checkbox"/> | <input type="checkbox"/> Eukaryotic cell lines         |
| <input checked="" type="checkbox"/> | <input type="checkbox"/> Palaeontology and archaeology |
| <input checked="" type="checkbox"/> | <input type="checkbox"/> Animals and other organisms   |
| <input checked="" type="checkbox"/> | <input type="checkbox"/> Clinical data                 |
| <input checked="" type="checkbox"/> | <input type="checkbox"/> Dual use research of concern  |

## Methods

- | n/a                                 | Included in the study                           |
|-------------------------------------|-------------------------------------------------|
| <input checked="" type="checkbox"/> | <input type="checkbox"/> ChIP-seq               |
| <input checked="" type="checkbox"/> | <input type="checkbox"/> Flow cytometry         |
| <input checked="" type="checkbox"/> | <input type="checkbox"/> MRI-based neuroimaging |
